# Supplementary material
Source: publisher figshare collection journal article supplement (https://aacr.figshare.com/articles/dataset/_/23274975)
Supplement: Supplementary file 1 [file 41022612]

**C3b/iC3b  
binding**

**Fig 3A: A549 cells +  
GT103 vs. IgG in NHS**

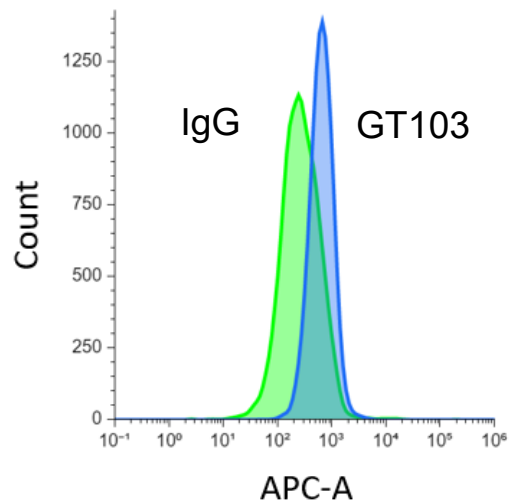

**Fig 3B: H460 cells +  
GT103 vs. IgG in NHS**

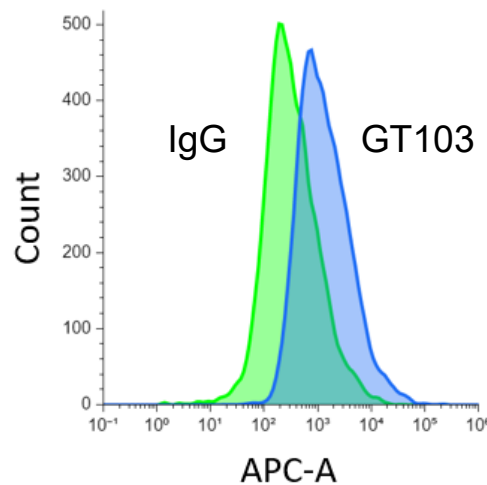

**Fig 3B: H60 cells + GT103 in  
C1q vs. Factor B depleted NHS**

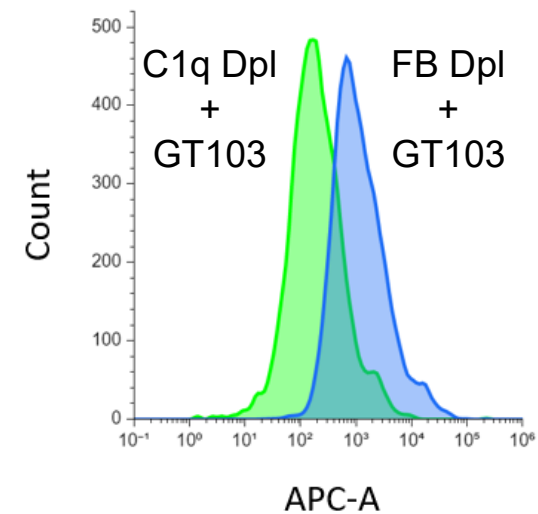

**C1q  
binding**

**Fig 3C: H460 cells +  
GT103 vs. IgG in NHS**

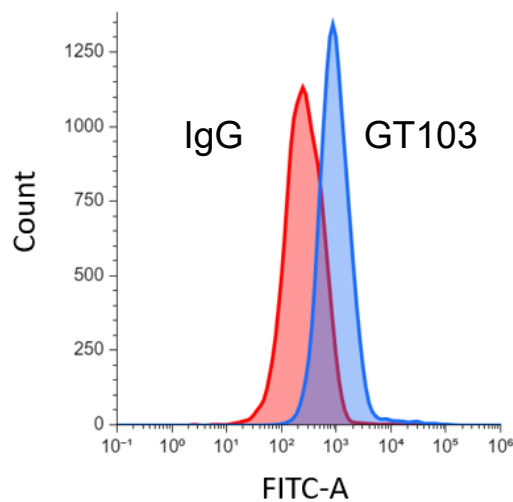

**Fig 3C: H460 cells +  
GT103 vs. F(ab')<sub>2</sub> in NHS**

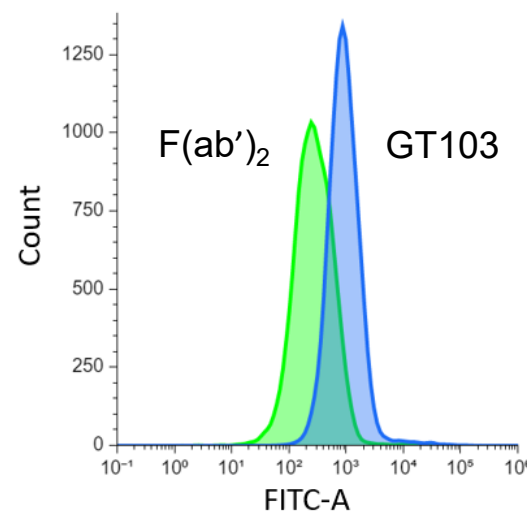

**Figure S3. Flow cytometry histograms of C3b/iC3b or C1q binding to NSCLC cells incubated with normal human serum (NHS) or depleted (Dpl) NHS + antibodies. Antibodies are GT103, subtype-matched IgG, or F(ab')<sub>2</sub> of GT103. Homogeneous populations of tumor cells were gated to eliminate only debris. Key comparisons from the denoted parts of **Figure 3** are shown.**
